# Supplementary material for: Towards a structurally resolved human protein interaction network
Source: PubMed Central journal article supplement (PMC9935395; doi:10.1038/s41594-022-00910-8), 2023-01-23
Supplement: 41594_2022_910_MOESM1_ESM.pdf [file 41594_2022_910_MOESM1_ESM.pdf]

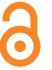

# Towards a structurally resolved human protein interaction network

---

In the format provided by the authors and unedited

Figure S1:

All the strongest up- or down-regulation phosphosites for each group.

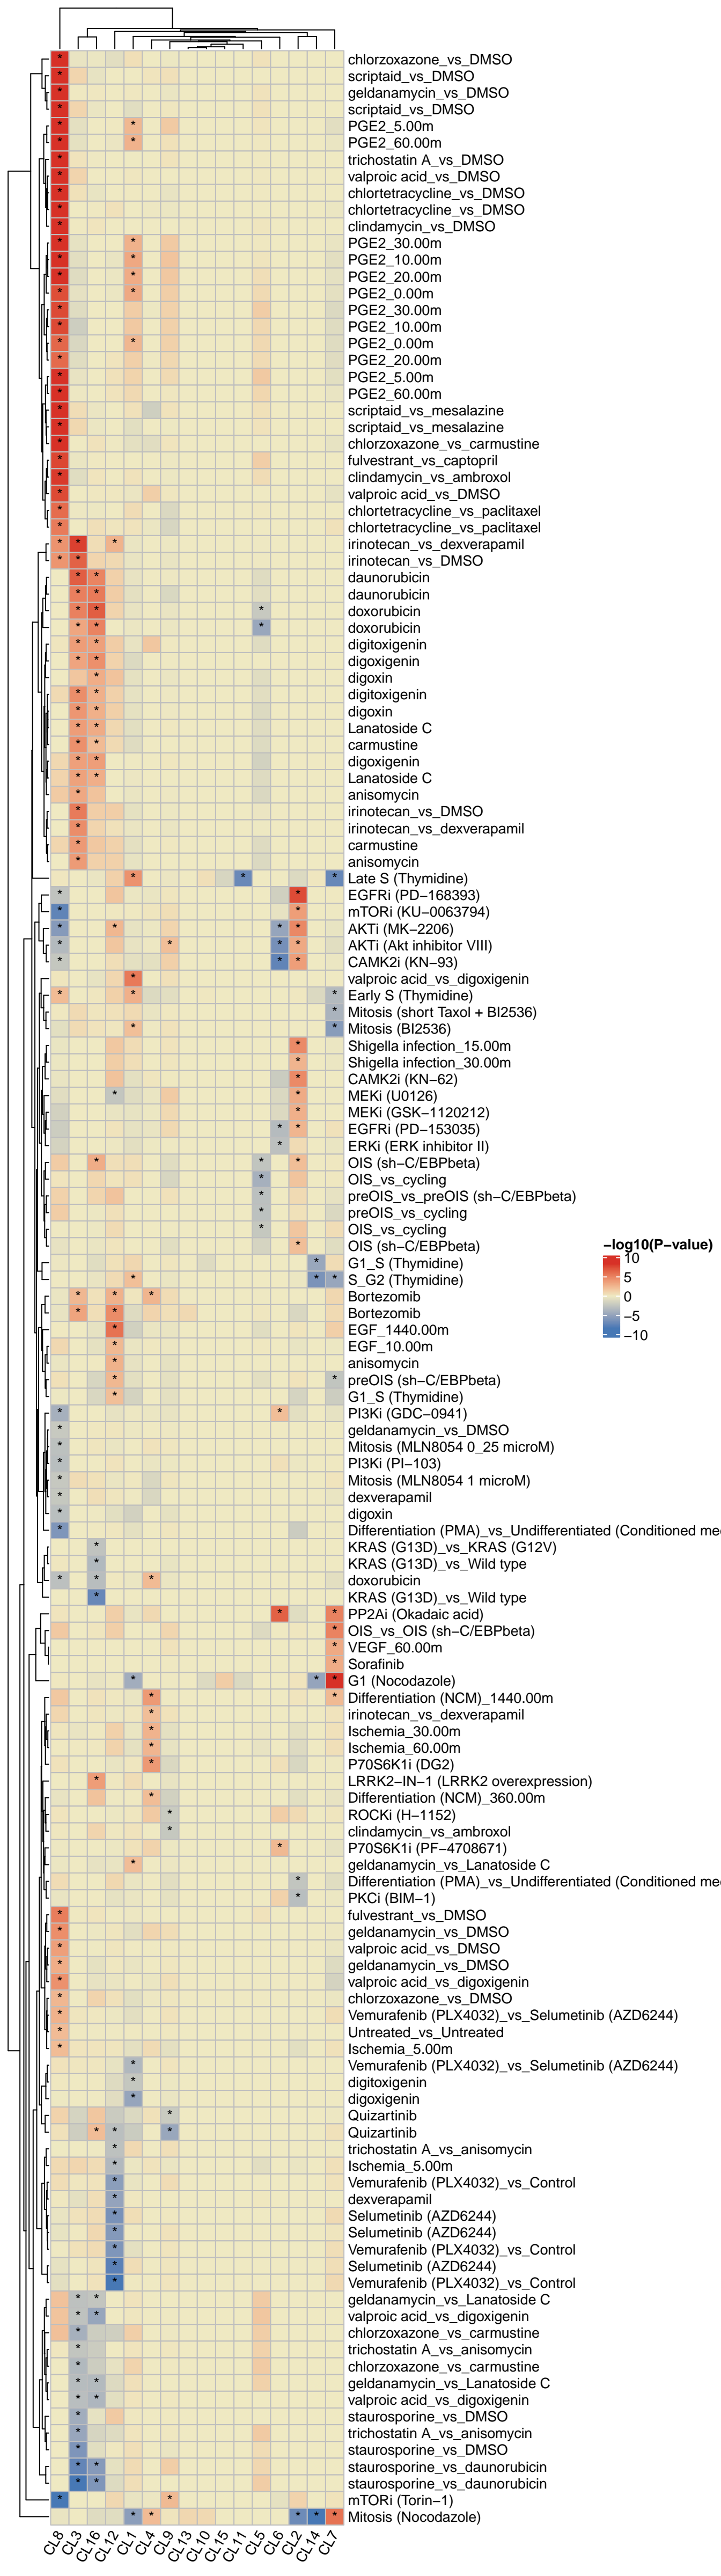

Figure S2: Network of all protein interactions. Highly-confident interactions are in red others in blue.

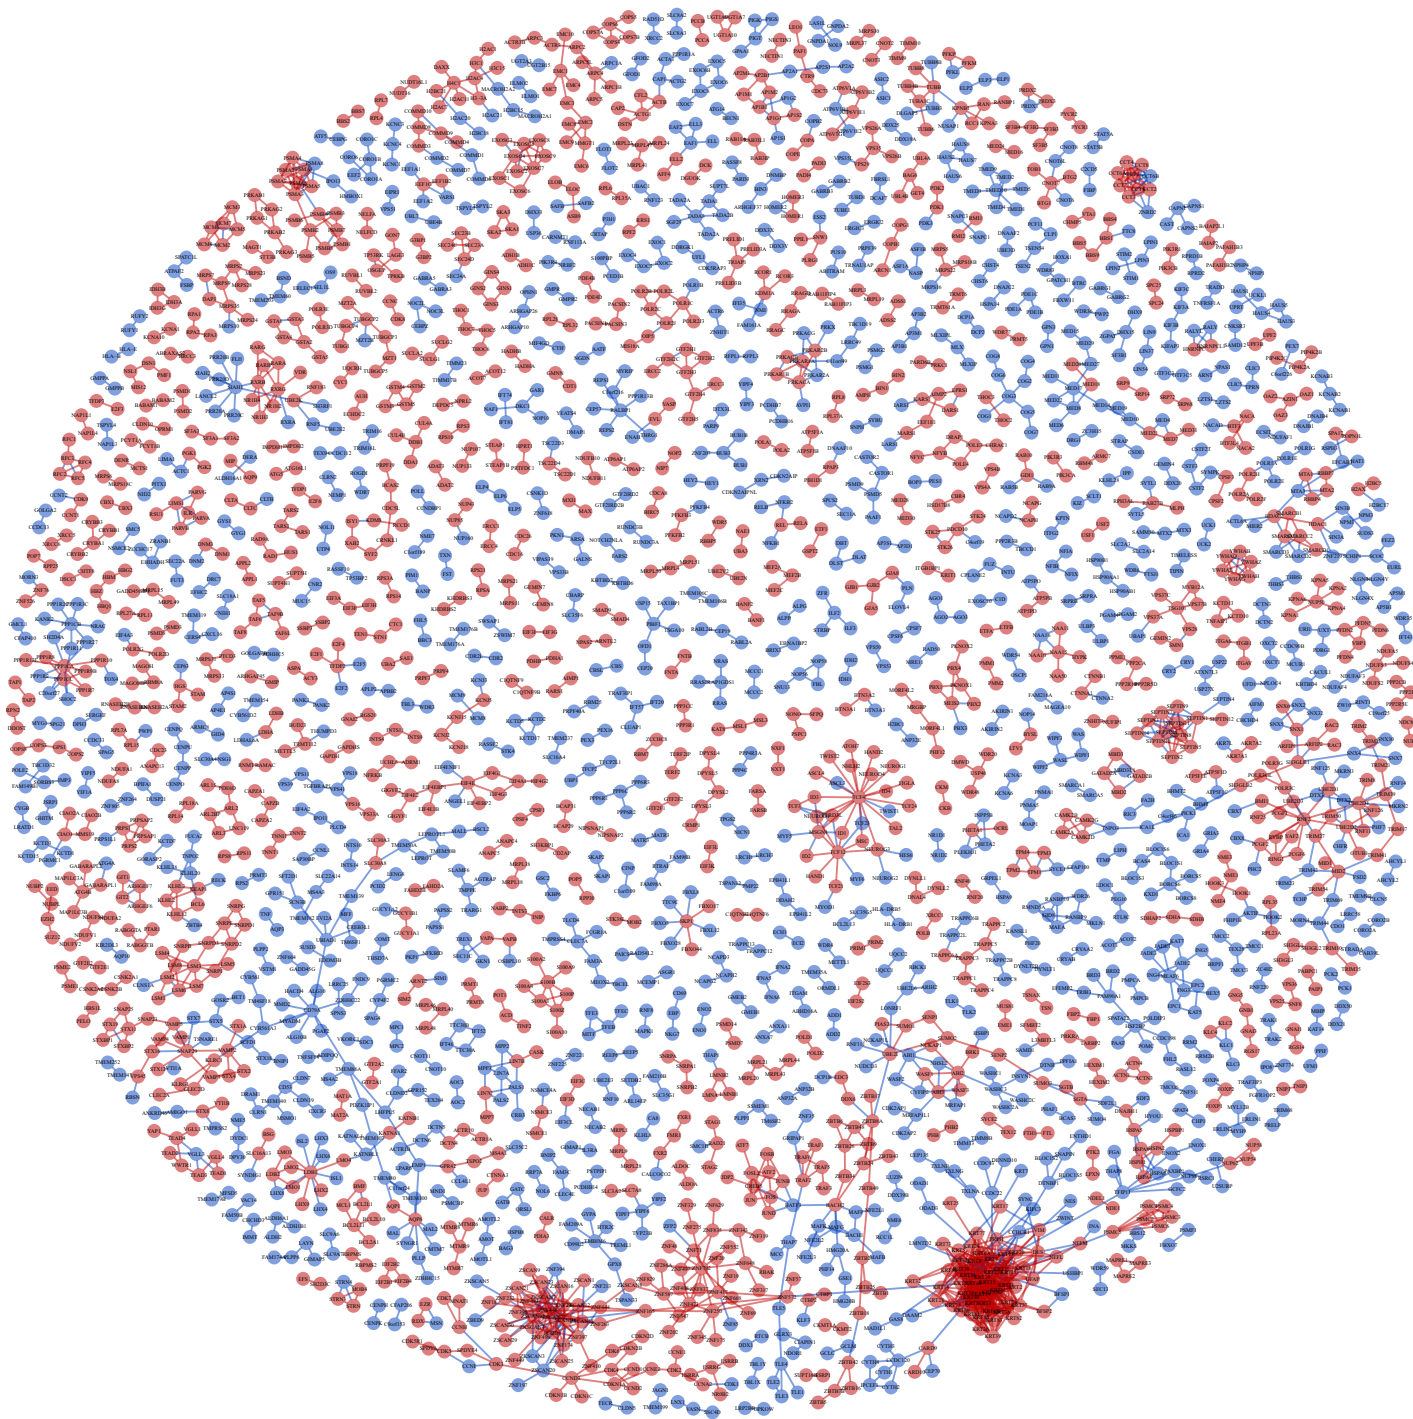

Figure S3: Modelling of the ERCC3 complex.



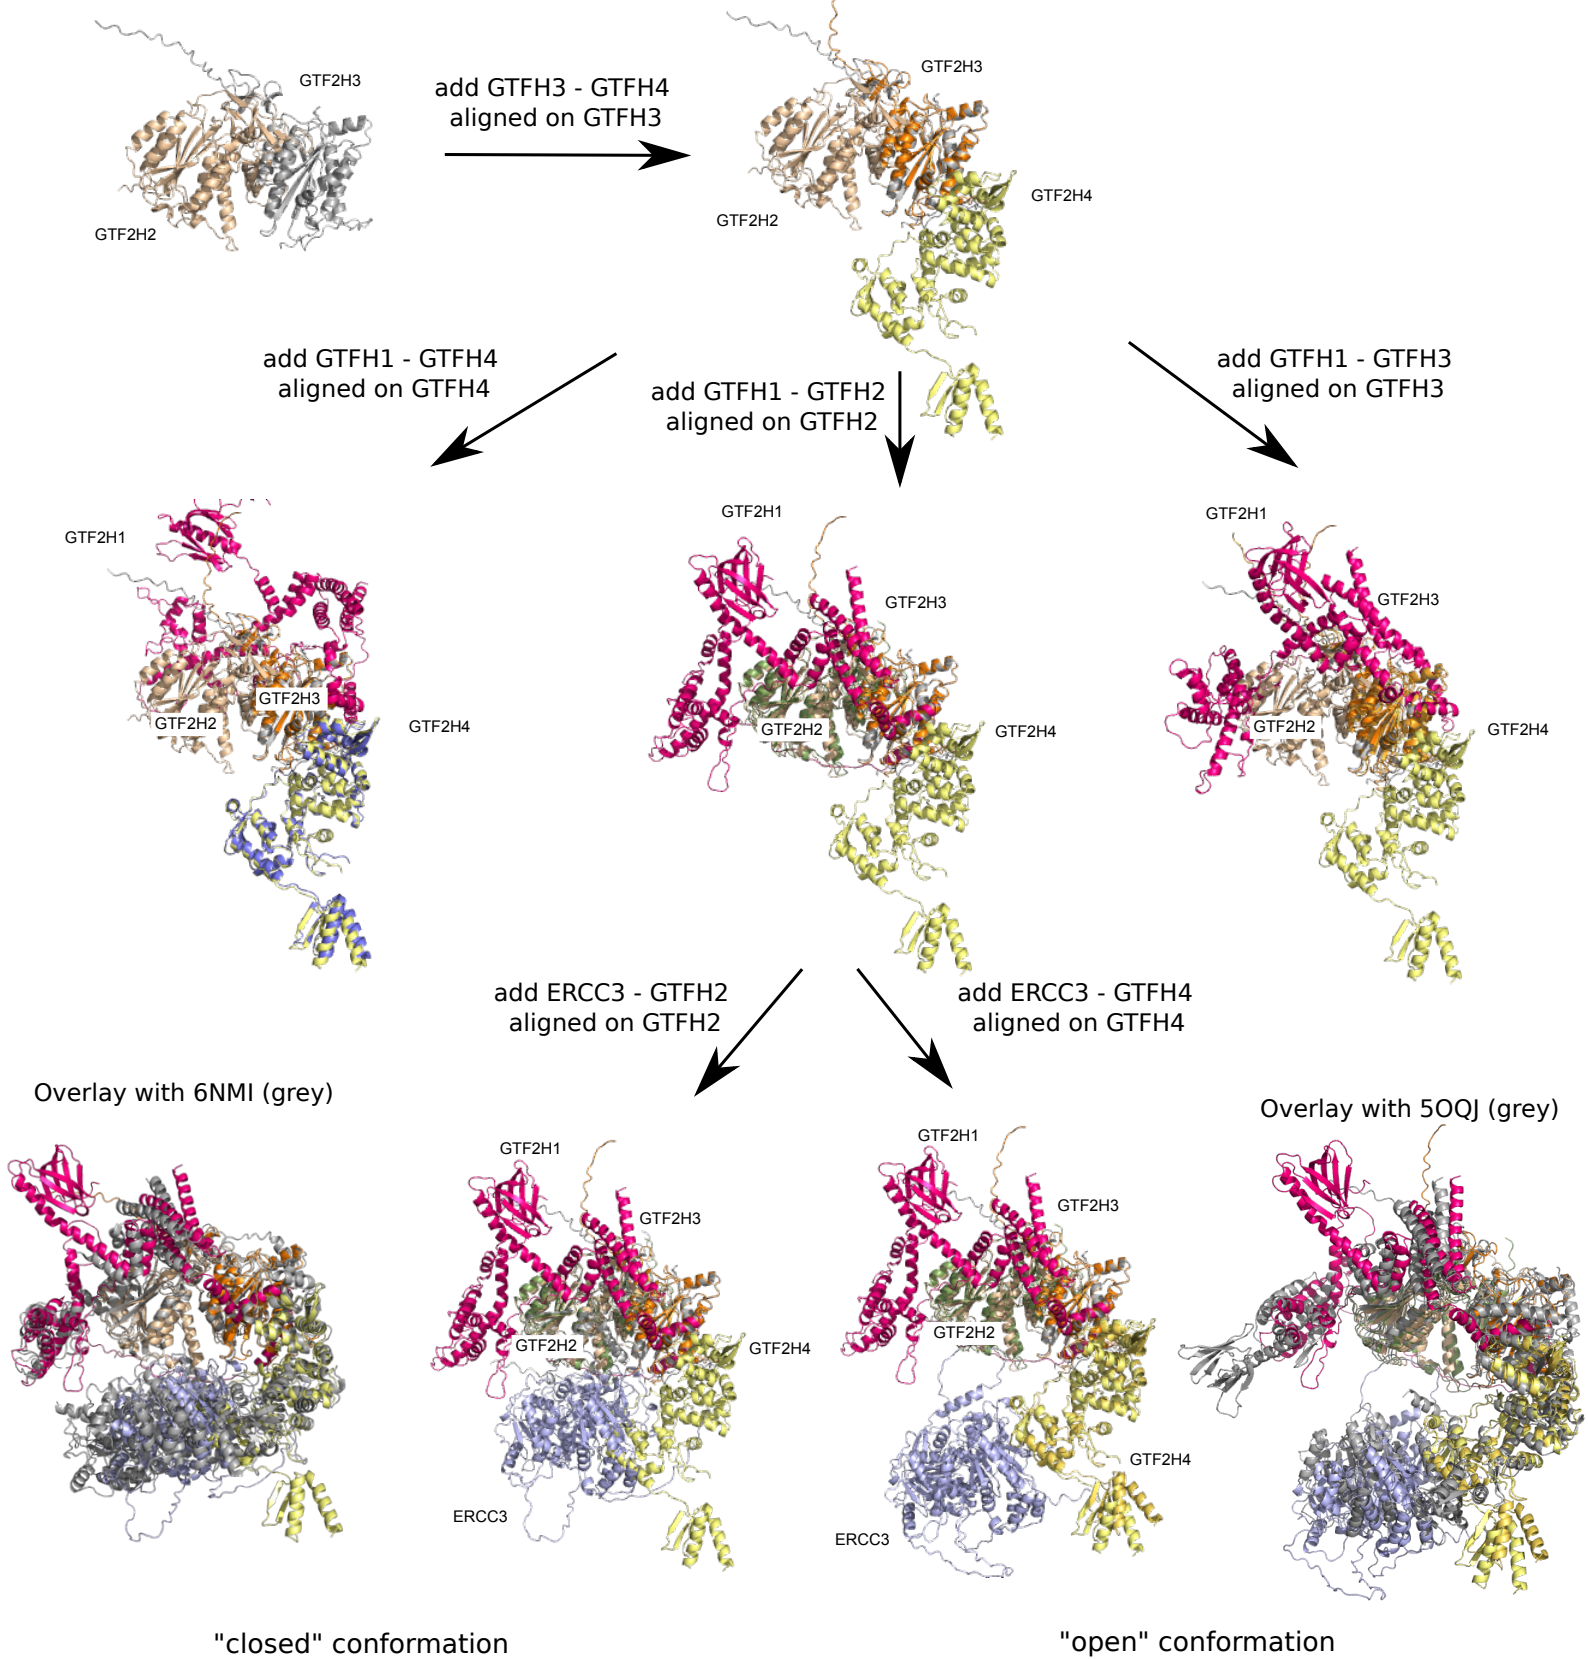

Figure S4: Modelling of the large complexes *Methanothermococcus thermolithotrophicus* (pdb:5ODC) and the eukaryotic translation initiation factor 2B from *Schizosaccharomyces pombe* (pdb:5B04).



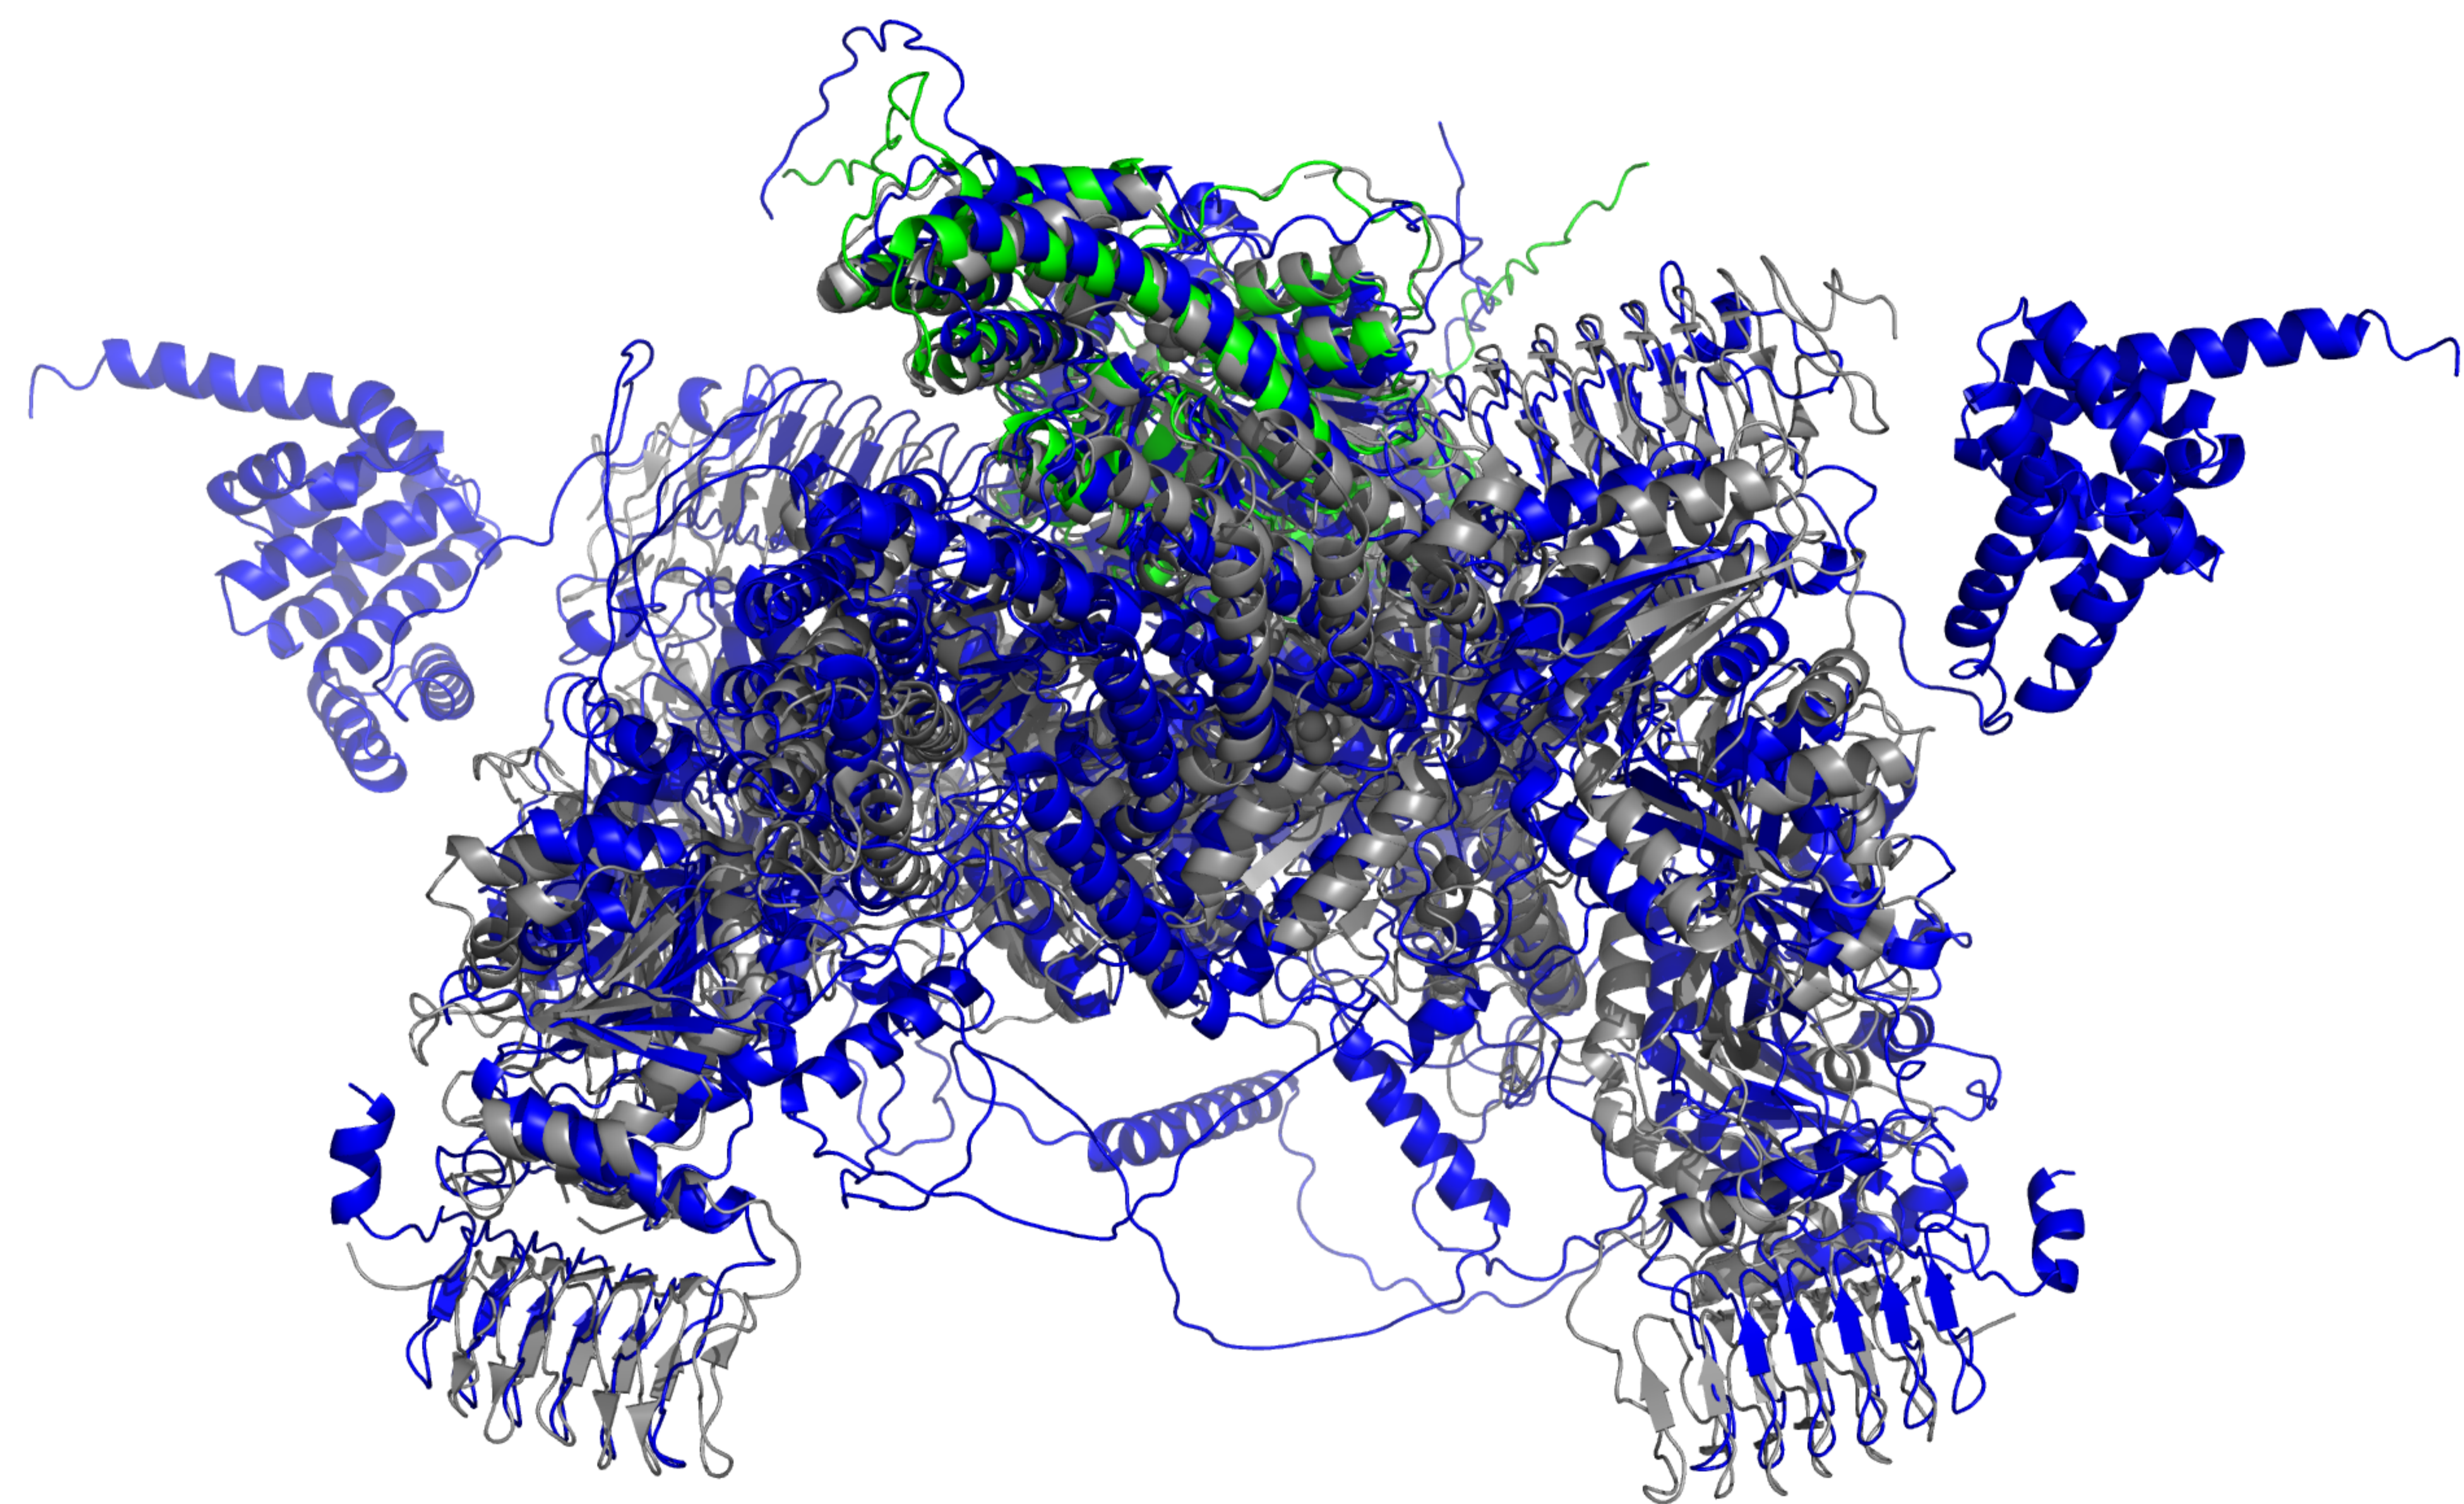

**5B04**

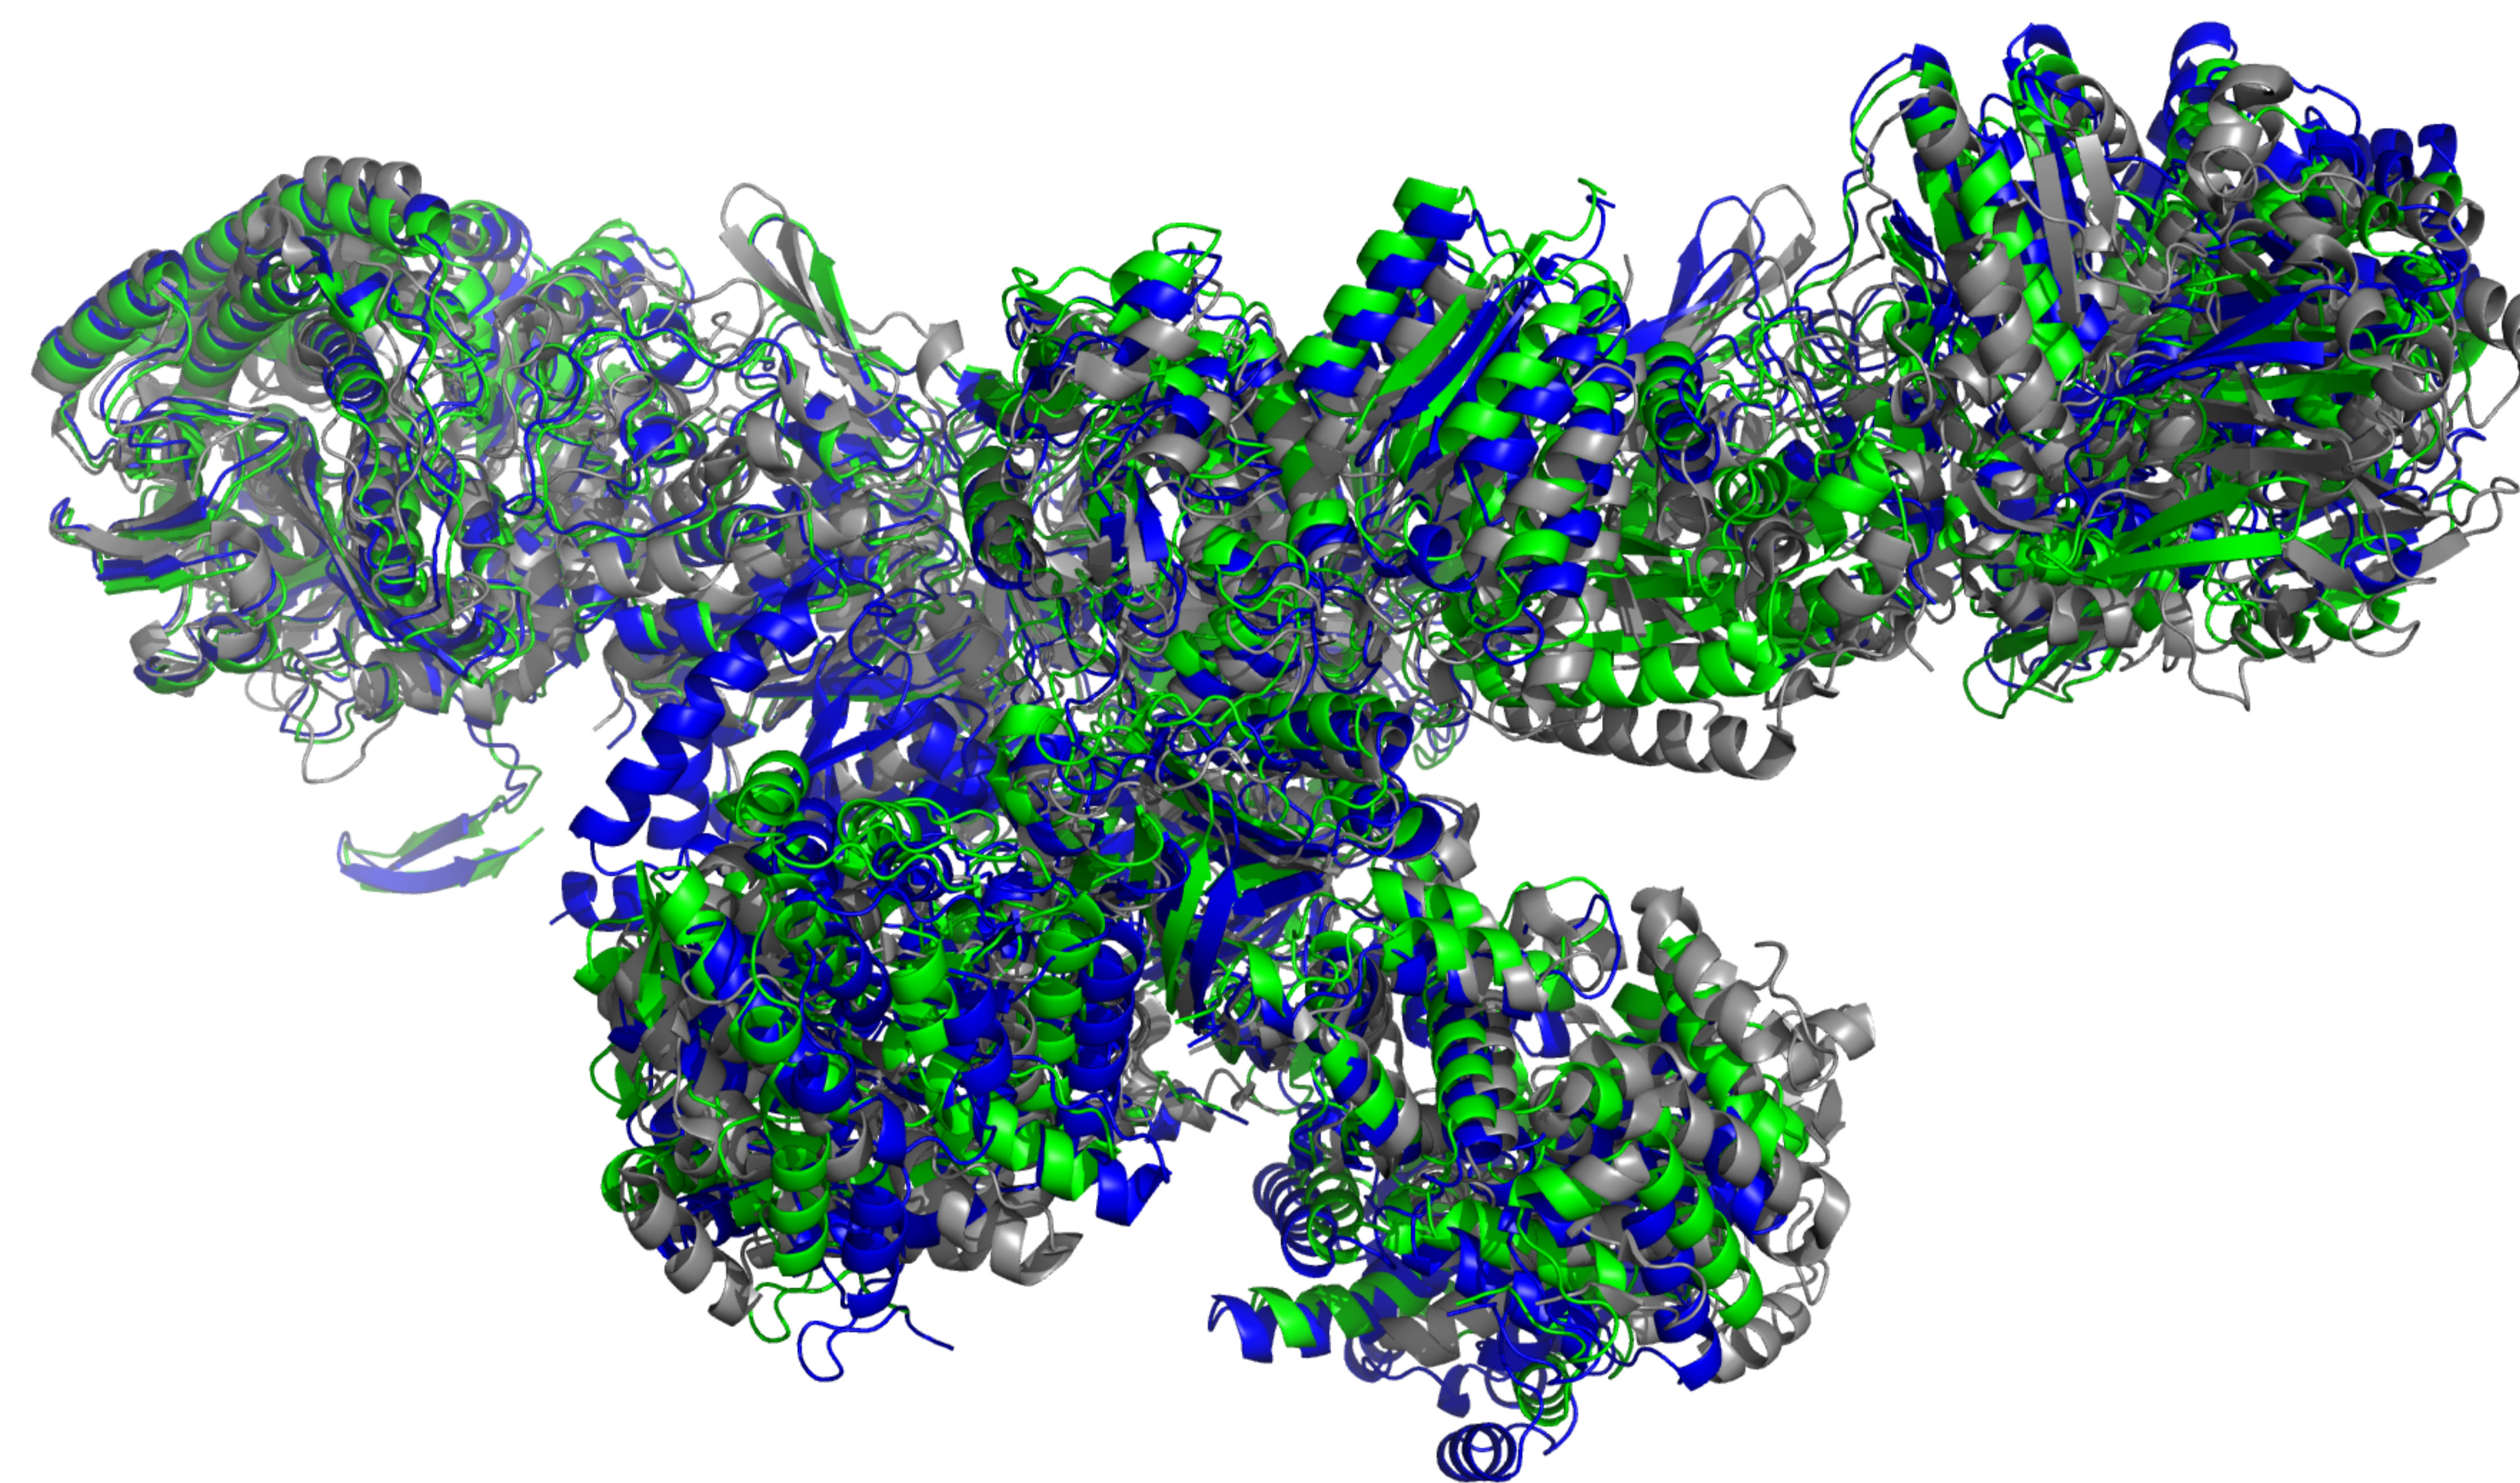

**50DC**

Grey: PDB structure, Green: Model build from dimers, Blue: Model built from trimers
